# Supplementary material for: A Robust Hybrid Deep Learning Model for Spatiotemporal Image Fusion
Source: MDPI journal article supplement (doi:10.3390/rs13245005), 2021-12-09
Supplement: s1 [file s1]

Archive with 1 entries (1 files):
- remotesensing-1458903-supplementary.pdf
